# Supplementary material
Source: PubMed Central journal article supplement (PMC3946056)
Supplement: NIHMS543012-supplement-supplemental_material.pdf [file NIHMS543012-supplement-supplemental_material.pdf]

## **SUPPLEMENTAL MATERIAL**

**Supplemental Table 1.** Baseline lipoprotein(a) concentrations according to ethnicity

| <b>Baseline Lipoprotein(a) levels (nmol / L)</b> |      |        |                                      |                    |
|--------------------------------------------------|------|--------|--------------------------------------|--------------------|
|                                                  | N    | Median | 25 <sup>th</sup> -75 <sup>th</sup> % | 90 <sup>th</sup> % |
| White                                            | 7730 | 23     | 10 – 50                              | 116                |
| Black                                            | 853  | 60     | 34 – 100                             | 165                |
| Asian                                            | 138  | 38     | 18 – 60                              | 111                |
| Hispanic                                         | 784  | 24     | 11 – 46                              | 101                |
| Other/Unknown                                    | 86   | 32     | 12 – 80                              | 138                |
| All                                              | 9591 | 26     | 11 – 56                              | 122                |

N in each group reflective of number of participants with baseline Lp(a) value available.

**Supplemental Table 2.** Spearman correlation coefficients of lipoprotein(a) with other variables

|                     | <b>Baseline</b>      | <b>On-Statins</b>    |
|---------------------|----------------------|----------------------|
|                     | Spearman coefficient | Spearman coefficient |
| Age                 | 0.04                 | 0.04                 |
| BMI                 | - 0.07               | - 0.07               |
| SBP                 | - 0.03               | 0.009                |
| DBP                 | - 0.05               | - 0.02               |
| hsCRP               | 0.04                 | 0.04                 |
| LDL-C               | 0.13                 | 0.18                 |
| HDL-C               | 0.06                 | 0.04                 |
| Triglycerides       | - 0.08               | - 0.07               |
| Total cholesterol   | 0.08                 | 0.12                 |
| Apolipoprotein B    | 0.08                 | 0.18                 |
| Apolipoprotein A-I  | 0.03                 | 0.03                 |
| Glucose             | - 0.07               | - 0.07               |
| Glycated hemoglobin | 0.003                | - 0.01               |
| GFR                 | - 0.04               | - 0.04               |

On-statin biomarkers assessed at the twelve-month visit (except for glucose and glycated hemoglobin, assessed at twenty-four months). All correlations were statistically significant ( $P < 0.05$ ) except for glycated hemoglobin in the baseline Lp(a) analysis, and SBP, DBP, Apolipoprotein A-I, glycated hemoglobin, and GFR in the on-statin analysis. 7,730 and 3,877 white participants had Lp(a) concentrations available for baseline and on-statin analyses respectively.

**Supplemental Table 3.** Association between baseline lipoprotein(a) and clinical outcomes among white JUPITER participants randomly allocated to placebo

|                                              | Quartile One | Quartile Two                      | Quartile Three                    | Quartile Four                      | P-trend | HR/SD increase        | P-value |
|----------------------------------------------|--------------|-----------------------------------|-----------------------------------|------------------------------------|---------|-----------------------|---------|
| Range (nmol/L)                               | ≤ 10         | 11 - 23                           | 24 - 49                           | ≥ 50                               |         |                       |         |
| <b>Primary Endpoint</b>                      |              |                                   |                                   |                                    |         |                       |         |
| # of events / N                              | 26 / 974     | 38 / 968                          | 23 / 974                          | 49 / 939                           |         | 136 / 3855            |         |
| Incidence rate, per 100 person years         | 1.20         | 1.71                              | 1.05                              | 2.27                               | 0.04    | 1.56                  |         |
| Model One                                    | 1.00         | 1.44<br>(0.87 - 2.37)<br>P = 0.14 | 0.90<br>(0.51 - 1.57)<br>P = 0.75 | 1.93<br>(1.20 - 3.10)<br>P = 0.007 | 0.03    | 1.18<br>(1.00 - 1.38) | 0.05    |
| Model Two                                    | 1.00         | 1.45<br>(0.88 - 2.39)<br>P = 0.15 | 0.88<br>(0.49 - 1.53)<br>P = 0.61 | 1.94<br>(1.19 - 3.14)<br>P = 0.007 | 0.03    | 1.18<br>(1.00 - 1.39) | 0.06    |
| <b>Primary Endpoint Plus Total Mortality</b> |              |                                   |                                   |                                    |         |                       |         |
| # of events / N                              | 37 / 974     | 46 / 968                          | 33 / 974                          | 61 / 939                           |         | 177 / 3855            |         |
| Incidence rate, per 100 person years         | 1.70         | 2.07                              | 1.51                              | 2.82                               | 0.05    | 2.02                  |         |
| Model One                                    | 1.00         | 1.22<br>(0.79 - 1.89)<br>P = 0.36 | 0.90<br>(0.56 - 1.44)<br>P = 0.65 | 1.67<br>(1.10 - 2.51)<br>P = 0.01  | 0.04    | 1.18<br>(1.03 - 1.36) | 0.02    |
| Model Two                                    | 1.00         | 1.24<br>(0.80 - 1.91)<br>P = 0.34 | 0.88<br>(0.55 - 1.42)<br>P = 0.60 | 1.69<br>(1.11 - 2.56)<br>P = 0.01  | 0.04    | 1.19<br>(1.03 - 1.38) | 0.02    |

Hazard ratios are expressed per 1-SD increment in ln Lp(a), with 1-SD representing an approximately 2.5-fold increment in Lp(a).

Model One: Adjusted for age and gender.

Model Two: Adjusted for age, gender, smoking, family history of premature coronary disease, body mass index, systolic blood pressure, and on-treatment levels of fasting glucose, HDL-cholesterol, LDL-cholesterol, ln triglycerides, and ln hsCRP

**Supplemental Table 4.** Association between baseline lipoprotein(a) and clinical outcomes among white JUPITER participants randomly allocated to rosuvastatin

|                                              | Quartile One | Quartile Two                      | Quartile Three                    | Quartile Four                     | P-trend | HR/SD increase        | P-value |
|----------------------------------------------|--------------|-----------------------------------|-----------------------------------|-----------------------------------|---------|-----------------------|---------|
| Range (nmol/L)                               | ≤ 10         | 11 – 23                           | 24 – 49                           | ≥ 50                              |         |                       |         |
| <b>Primary Endpoint</b>                      |              |                                   |                                   |                                   |         |                       |         |
| # of events / N                              | 18 / 1017    | 12 / 916                          | 21 / 945                          | 23 / 997                          |         | 74 / 3875             |         |
| Incidence rate, per 100 person years         | 0.79         | 0.58                              | 0.99                              | 1.01                              | 0.23    | 0.85                  |         |
| Model One                                    | 1.00         | 0.75<br>(0.36 – 1.56)<br>P = 0.45 | 1.24<br>(0.66 – 2.33)<br>P = 0.51 | 1.36<br>(0.74 – 2.53)<br>P = 0.33 | 0.17    | 1.24<br>(0.99 – 1.54) | 0.06    |
| Model Two                                    | 1.00         | 0.78<br>(0.37 – 1.62)<br>0.50     | 1.24<br>(0.65 – 2.37)<br>P = 0.51 | 1.24<br>(0.65 – 2.38)<br>P = 0.51 | 0.31    | 1.20<br>(0.95 – 1.50) | 0.13    |
| <b>Primary Endpoint Plus Total Mortality</b> |              |                                   |                                   |                                   |         |                       |         |
| # of events / N                              | 22 / 1017    | 17 / 916                          | 33 / 945                          | 34 / 997                          |         | 106 / 3875            |         |
| Incidence rate, per 100 person years         | 0.96         | 0.82                              | 1.55                              | 1.49                              | 0.04    | 1.21                  |         |
| Model One                                    | 1.00         | 0.83<br>(0.44 – 1.55)<br>P = 0.56 | 1.50<br>(0.88 – 2.57)<br>P = 0.13 | 1.56<br>(0.92 – 2.66)<br>P = 0.10 | 0.03    | 1.29<br>(1.08 – 1.55) | 0.01    |
| Model Two                                    | 1.00         | 0.84<br>(0.45 – 1.59)<br>P = 0.60 | 1.49<br>(0.86 – 2.56)<br>P = 0.15 | 1.45<br>(0.83 – 2.51)<br>P = 0.19 | 0.07    | 1.25<br>(1.04 – 1.51) | 0.02    |

Hazard ratios are expressed per 1-SD increment in ln Lp(a), with 1-SD representing an approximately 2.5-fold increment in Lp(a).

Model One: Adjusted for age and gender.

Model Two: Adjusted for age, gender, smoking, family history of premature coronary disease, body mass index, systolic blood pressure, and on-treatment levels of fasting glucose, HDL-cholesterol, LDL-cholesterol, ln triglycerides, and ln hsCRP

**Supplemental Table 5.** Association between baseline lipoprotein(a) with incident primary endpoint events stratified by baseline characteristics among white JUPITER participants

|                     |                      | # of events / N | HR/SD              | P-Value | P-interaction |
|---------------------|----------------------|-----------------|--------------------|---------|---------------|
| Sex                 | Male                 | 164 / 5161      | 1.20 (1.04 - 1.40) | 0.01    | 0.86          |
|                     | Female               | 46 / 2569       | 1.17 (0.89 - 1.53) | 0.27    |               |
| Treatment group     | Placebo              | 136 / 3855      | 1.16 (0.99 - 1.36) | 0.07    | 0.80          |
|                     | Rosuvastatin         | 74 / 3875       | 1.21 (0.97 - 1.50) | 0.09    |               |
| Current smoker      | No                   | 164 / 6622      | 1.17 (1.01 - 1.36) | 0.03    | 0.90          |
|                     | Yes                  | 46 / 1108       | 1.15 (0.88 - 1.50) | 0.32    |               |
| FH of premature CHD | No                   | 174 / 6653      | 1.15 (1.00 - 1.33) | 0.05    | 0.58          |
|                     | Yes                  | 36 / 1051       | 1.28 (0.93 - 1.74) | 0.13    |               |
| Metabolic syndrome  | No                   | 122 / 4788      | 1.21 (1.03 - 1.43) | 0.02    | 0.74          |
|                     | Yes                  | 86 / 2886       | 1.15 (0.93 - 1.42) | 0.19    |               |
| Aspirin use         | No                   | 149 / 6269      | 1.16 (1.00 - 1.36) | 0.06    | 0.77          |
|                     | Yes                  | 61 / 1461       | 1.20 (0.95 - 1.52) | 0.13    |               |
| LDL-C               | ≥ Median (110 mg/dl) | 109 / 3904      | 1.15 (0.97 - 1.38) | 0.12    | 0.83          |
|                     | < Median             | 101 / 3824      | 1.19 (0.99 - 1.45) | 0.07    |               |
| hsCRP               | ≥ Median (4.0 mg/L)  | 112 / 3869      | 1.05 (0.88 - 1.26) | 0.58    | 0.09          |
|                     | < Median             | 98 / 3861       | 1.32 (1.10 - 1.59) | 0.003   |               |
| HDL-C               | ≥ Median (50 mg/dl)  | 87 / 4015       | 1.27 (1.05 - 1.55) | 0.01    | 0.39          |
|                     | < Median             | 123 / 3714      | 1.13 (0.95 - 1.35) | 0.16    |               |

Analysis reflects unadjusted hazard ratios per 1-SD increment in ln Lp(a). Family history of premature coronary disease defined as diagnosis of the disease in a male first-degree relative before the age of 55 years or in a female first-degree relative before the age of 65 years.

**Supplemental Table 6.** Association between on-statin lipoprotein(a) and residual risk among white JUPITER participants randomly allocated to rosuvastatin

|                                              | Quartile One | Quartile Two                      | Quartile Three                    | Quartile Four                     | P-trend | HR/SD                 | P-value |
|----------------------------------------------|--------------|-----------------------------------|-----------------------------------|-----------------------------------|---------|-----------------------|---------|
| Range (nmol/L)                               | ≤ 10         | 11 – 23                           | 24 – 53                           | ≥ 54                              |         |                       |         |
| <b>Primary Endpoint</b>                      |              |                                   |                                   |                                   |         |                       |         |
| # of events / N                              | 19 / 1068    | 10 / 872                          | 22 / 984                          | 24 / 953                          |         | 75 / 3877             |         |
| Incidence rate, per 100 person years         | 0.79         | 0.52                              | 0.98                              | 1.10                              | 0.13    | 0.86                  |         |
| Model One                                    | 1.00         | 0.65<br>(0.30 – 1.39)<br>P = 0.26 | 1.16<br>(0.63 – 2.15)<br>P = 0.63 | 1.47<br>(0.81 – 2.69)<br>P = 0.21 | 0.10    | 1.29<br>(1.03 – 1.60) | 0.02    |
| Model Two                                    | 1.00         | 0.63<br>(0.29 – 1.36)<br>P = 0.24 | 1.11<br>(0.59 – 2.09)<br>P = 0.75 | 1.19<br>(0.63 – 2.25)<br>P = 0.60 | 0.35    | 1.21<br>(0.96 – 1.53) | 0.10    |
| <b>Primary Endpoint Plus Total Mortality</b> |              |                                   |                                   |                                   |         |                       |         |
| # of events / N                              | 23 / 1068    | 17 / 872                          | 31 / 984                          | 35 / 953                          |         | 106 / 3877            |         |
| Incidence rate, per 100 person years         | 0.96         | 0.88                              | 1.38                              | 1.61                              | 0.02    | 1.21                  |         |
| Model One                                    | 1.00         | 0.90<br>(0.48 – 1.69)<br>P = 0.75 | 1.33<br>(0.77 – 2.28)<br>P = 0.31 | 1.75<br>(1.03 – 2.97)<br>P = 0.04 | 0.02    | 1.30<br>(1.08 – 1.56) | 0.006   |
| Model Two                                    | 1.00         | 0.86<br>(0.46 – 1.62)<br>P = 0.64 | 1.24<br>(0.71 – 2.16)<br>P = 0.45 | 1.47<br>(0.85 – 2.56)<br>P = 0.17 | 0.09    | 1.23<br>(1.02 – 1.49) | 0.03    |

Hazard ratios are expressed per 1-SD increment in ln Lp(a), with 1-SD representing an approximately 2.5-fold increment in Lp(a).

Model One: Adjusted for age and gender.

Model Two: Adjusted for age, gender, smoking, family history of premature coronary disease, body mass index, systolic blood pressure, glucose, and on-treatment levels of HDL-cholesterol, LDL-cholesterol, ln triglycerides, and ln hsCRP.
